1 Relevance of Antibodies against the Chicken Anaemia Virus

2

3 Max Ingberman<sup>a</sup>; Luiz Felipe Caron<sup>a,b</sup>; Fernanda Rigo<sup>a</sup>; Liliam C. Araujo<sup>c</sup>; Marco A.P. de

4 Almeida<sup>c</sup>; Letícia Dal Bérto<sup>d</sup>; Breno Castello Branco Beirão<sup>a,b</sup>

5

6 <sup>a</sup>Imunova Análises Biológicas, Curitiba, 80215-182, Brazil.

7 <sup>b</sup>Universidade Federal do Paraná, Setor de Ciências Biológicas UFPR, Curitiba, 81531-980,

8 Brazil.

9 <sup>c</sup>Hendrix Genetics, Estr. Mun. Slt-161, Km 08, 53, Salto, 13328-400, Brazil.

10 <sup>d</sup>Elanco Brasil, Av. Morumbi, 8264, São Paulo, 04703-002, Brazil.

11 \*Corresponding author at: Av. Cel. Francisco H. dos Santos, s/n, Setor de Ciências Biológicas

12 UFPR, Curitiba, CEP 81531-980, Brazil. E-mail adress: breno.beirao@ufpr.br (B.C.B. Beirão)

13

14

15 **ABSTRACT**

16 *Background:* Chicken Infectious Anaemia (CIA) Virus (CAV) curtails the function of multiple  
17 immune compartments. Mortality due to blatant infection is controlled in broilers by passive  
18 immunization derived from vaccinated breeders. Therefore, chicks are often assessed by  
19 serology to determine maternally-derived antibodies (MDA).

20 *Methods:* A vaccine overdose-induced model of CIA. The model replicated the most common  
21 features of the disease. This model was used to determine the role of MDA in the protection of  
22 chicks. Hatchlings were tested for anti-CAV by ELISA and were sorted into groups based on  
23 antibody levels. SPF chicks were used as a no-antibody control.

24 *Results:* Lower specific antibody levels seemed to facilitate viral entry into the thymus, but viral  
25 levels, CD4<sup>+</sup> and CD8<sup>+</sup> counts, thymus architecture, and haematocrit were preserved by MDA,  
26 regardless of its levels.

27 *Conclusion:* Levels of MDA are not correlated with CIA, but are important for CAV infection.

28

29 **IMPORTANCE**

30 Vaccination is paramount in broiler production. Many of the vaccines are given to broiler  
31 breeders, instead of to the broilers themselves. This is cost-effective and practical, since in  
32 vaccinating one breeder hundreds of broilers are born with maternally-derived protection. To  
33 assess the quality of maternal immunity, antibodies are measured in their chicks. For Chicken  
34 Anaemia, this does not seem to suffice to verify protection. This viral disease is very common,  
35 and measuring maternal immunity against it determines whether to purchase chicks from a  
36 breeder farm. In this study, we verified that antibodies are not correlated with protection from  
37 the disease, and therefore should not be used as the sole parameter in assessing immunity  
38 against Chicken Anaemia in broilers.

39

40 *Keywords:*

41 Chicken anaemia virus

42 Maternal antibodies

43 Vaccination

44 Breeder

45 Correlates of protection

46

47 **Abbreviations:** CAV, chicken anaemia virus; D, days; MDA, maternally derived antibodies;

48 PFU, plaque-forming unit; qPCR, quantitative real-time polymerase chain reaction; SPF,

49 specific-pathogen-free.

50

## 51 **1. Introduction**

52 Chicken infectious anaemia is prevalent worldwide in commercial production settings.  
53 Nevertheless, clinical disease in broilers has been controlled by the immunization of breeders  
54 [1]. The disease is caused by the Chicken Anaemia Virus (CAV), of the Gyrovirus genus.  
55 Infection of chicks results in viral replication in haemocyto blasts and lymphoid progenitors,  
56 leading to erythrocyte and lymphocyte loss [2,3]. After the first 21 days post-hatch, healthy  
57 birds become virtually resistant to clinical disease from CAV infection [3]. Therefore,  
58 prevention of the disease is focussed mostly on the vaccination of breeders. It is thus expected  
59 that antibodies can be produced and transmitted to their progeny via yolk. In this way, antibody  
60 levels in chicks are thought to be correlated to protection against CAV [4].

61 Here, a practical chicken anaemia disease model was established, demonstrating evident  
62 clinical and pathological signs. Using this model, it was possible to verify the role of maternally  
63 derived antibodies in the protection of the progeny.

64

## 65 **2. Materials and Methods**

66

### 67 *2.1. Trials and challenge*

68 Two trials were performed. The first trial aimed to standardize a vaccine overdose trial for  
69 chicken anaemia. Previous work demonstrated that immunosuppressed chickens had vaccine  
70 virus persistency and showed symptoms, but a simple and reproducible model for chicken  
71 anaemia had not yet been established [5]. Here, birds were challenged 1-day post-hatch by 100  
72 times overdose of a CAV vaccine applied via the subcutaneous route with a G24 needle  
73 (AviPro™ Thymovac, Elanco, Germany, Lot 07/2019). Parenteral infection is known to induce  
74 more prominent Chicken Anaemia disease [6]. This trial was comprised of the following  
75 treatment groups: 1) Not challenged, maternally derived antibodies (MDA) – chicks from

76 immunized breeders, not challenged; 2) Challenged, no MDA – SPF chicks, challenged; 3)  
77 Challenged, MDA – chicks from immunized breeders, challenged. Chickens were vaccinated at  
78 12 weeks of age with a commercially available product (AviPro™ Thymovac, Elanco,  
79 Germany, Lot 05/2017). Chicks were derived from 34-week old breeders. Breeder hens were  
80 maintained in Domelia, Brazil. Chicks were hatched in Salto, Brazil. SPF chicks were incubated  
81 in the laboratory and were housed in isolators when hatched, when the challenge was performed  
82 (SPF birds from Valo BioMedia do Brasil, Brazil). Animals were assessed on D1, D7, D14,  
83 D21 for anti-CAV antibodies, virus detection in thymus by qPCR, peripheral blood  
84 immunophenotype, and haematocrit measurement. On days 7, 14, and 21 thymuses were  
85 collected for histology assessment of lesions.

86 The second trial aimed to determine the role of maternal antibodies in the protection induced by  
87 breeder vaccination. Chickens were vaccinated at 13 weeks of age with a commercially  
88 available product (AviPro™ Thymovac, Elanco, Germany, Lot 07/2019). Chicks were derived  
89 from 36-week old breeders. Breeder hens were maintained in Itapetininga, Brazil. Chicks were  
90 hatched in Salto, Brazil. SPF chicks were incubated in the laboratory and were housed in  
91 isolators when hatched, and when the challenge was performed (SPF birds from Valo BioMedia  
92 do Brasil, Brazil). SPF birds were used for the infection control since all breeders are vaccinated  
93 for CAV in Southern Brazil, thus not being possible to use their offspring as the control group  
94 in this study. Chicks from vaccinated breeders were selected for high or low antibody levels  
95 following an initial screening by ELISA. Therefore, the experimental groups were: 1)  
96 Challenged, Low MDA – chicks from immunized breeders, low levels of anti-CAV antibodies,  
97 challenged; 2) Challenged, High MDA – chicks from immunized breeders, high levels of anti-  
98 CAV antibodies, challenged; 3) Challenged, no MDA – SPF chicks, challenged. Animals were  
99 assessed on D1, D3, D14, D21 for anti-CAV antibodies, virus detection in thymus by qPCR,  
100 and haematocrit measurement. On day 14 thymuses were collected for histology assessment of  
101 lesions.

102 In both trials, blood was collected from the wing vein. *Gallus gallus* were from Hendrix  
103 Genetics. Organs were collected following culling by cervical dislocation by trained personnel.  
104 The use of animals followed international welfare standards and was approved by the  
105 Committee for the use of animals in research of Imunova Análises Biológicas (committee n°  
106 01250.026160/2018-37 (586) registered by the Brazilian Ministry of Science and Technology).  
107 Chicks were housed in HEPA-filtered isolators with paper bedding. Handling was performed  
108 through gloves that entered the isolators and materials entering or leaving the isolators had to  
109 pass through a disinfectant solution. Water and food were supplied *ad libitum*. Feed was  
110 commercially formulated, providing for the dietary demands for the age and bird strains used  
111 [7]. Water was derived from the public supply. 30 birds were housed in each 1.2 m<sup>2</sup> isolator.  
112 Eight animals per group were removed at each sampling point. Sampling on D1 was conducted  
113 before housing the animals.

114

## 115 2.2. Laboratory methods

116 Immunophenotyping was performed by flow cytometry. A no-lysis-no-wash protocol was used  
117 for flow cytometry analysis of whole blood, as previously described [8]. Anti-chicken CD4 was  
118 FITC-coupled (clone CT-4). Anti-CD8 $\alpha$  was PE-coupled (clone CT-8). Anti-chicken CD45 was  
119 SPRD-coupled Antibodies by Southern Biotechnology. Absolute cell counts were performed  
120 with CountBright (ThermoFisher Scientific, Waltham, MA). Samples were triple stained with  
121 the antibodies. “Fluorescence-minus-one” controls were used to diminish spectral overlap.  
122 Samples were read in a FACScalibur cytometer (Becton Dickinson, Franklin Lakes, NJ).

123 For histologic lesion evaluation, thymuses were fixed in formalin. Paraffin-embedded  
124 sections were stained with haematoxylin-eosin. A trained veterinary pathologist was responsible  
125 for scoring the lesions. They were characterized from 0 to 3, including intermediary scores  
126 (0,5). The factors used for grading were medullar/cortical distinction, thymocyte depletion,

127 presence of coagulative necrosis, number of macrophages or segmented cells, and hyperaemia  
128 or haemorrhage.

129 qPCR for virus detection was performed as previously described. The number of  
130 plaque-forming units (PFU) was estimated by extracting DNA from viral cell cultures.  
131 Positivity for CAV was based on the limit of detection of the method (1054 PFU) [9].  
132 Haematocrit was determined by the microhematocrit capillary technique. A commercially  
133 available kit was used for CAV serology, following the instructions of the manufacturer (99-  
134 08702, Idexx, Westbrook, ME). Sera were tested at 1:10 and 1:100 dilutions.

135

### 136 *2.3. Statistical analysis*

137 For statistical analysis, each animal was the experimental unit. Data was assessed based on  
138 single or multiple measures and their distribution. Repeated measurements were assessed by  
139 two-way ANOVA with Tukey's posthoc test. Non-parametric data were analyzed by Kruskal-  
140 Wallis or Mann-Whitney's test. Significance was set at  $P < 0.10$ . Graphs and statistical analyses  
141 were performed on GraphPad Prism 6 (GraphPad Software, Inc., La Jolla, CA).

142

## 143 **3. Results**

144

### 145 *3.1. Establishment of a vaccine-induced model of Chicken Anaemia*

146 A 100 × overdose of the CAV vaccine administered parenterally to day-old chicks was able to  
147 induce typical Chicken Anaemia disease. The infection is known to directly affect T cell  
148 numbers, but not B cells. Here, virus was detected in high quantities in thymus in animals  
149 without maternal immunity. MDA delayed thymic infection (Fig.1A and Fig. 1B) and reduced  
150 lesions (Fig. 1C). Total leukocyte counts were reduced in challenged animals without  
151 maternally derived immunity, as were CD45<sup>+</sup>CD4<sup>-</sup>CD8<sup>+</sup> and CD45<sup>+</sup>CD4<sup>+</sup>CD8<sup>-</sup> cells.

152 Interestingly, triple stained CD45<sup>+</sup>CD4<sup>+</sup>CD8<sup>+</sup> cells were not affected by the challenge (Fig. 1D).  
153 Erythrocyte packed-cell volume was similarly affected by the vaccine overdose (Fig. 1E).  
154 Finally, the experimental infection reduced total body weight in chicks without maternal  
155 immunity by D21 post-hatch (Fig. 1F).

156

### 157 *3.2. CAV antibody levels in chicks determine early viral prevalence but not pathogenesis*

158 The established model of Chicken Anaemia was used to determine the role of maternally  
159 derived antibodies in the protection conferred to chicks following breeder vaccination. For this,  
160 hatchlings were segregated based on their maternal antibody levels (Fig. 2A). Chicks with high  
161 MDA had lower prevalence levels of thymic CAV on days 4 and 14 post-hatch (Fig. 2B).  
162 Nevertheless, regardless of MDA levels, only on D21 did chicks with MDA reach the same  
163 CAV infection levels of SPF birds (Fig. 2B). This was reflected also in lower scores of thymic  
164 lesions in chicks that received maternal immunity, regardless of antibody levels (Fig. 2C).  
165 Further, erythrocyte packed cell volume was preserved in birds with MDA, regardless of level,  
166 whereas SPF birds showed a marked decrease in its levels (Fig. 2D).

167

## 168 **4. Discussion**

169 Chicken anaemia virus (CAV) is a common pathogen in commercial farms of birds [1,10]. The  
170 virus affects precursor cells in the bone marrow and thymus, impacting on the production of T  
171 lymphocytes and erythrocytes, among other cell lineages. Appearance of disease following  
172 CAV infection is mostly restricted to the first two weeks post-hatch [3]. Therefore, it has  
173 become the norm that immunity is not conferred to chicks by direct vaccination of these birds,  
174 but of their breeders [1]. Because of this practice, maternally derived antibody (MDA) levels of  
175 day-old chicks are often seen as the ideal correlates of protection [4]. The results of this study  
176 suggest that anti-CAV antibody levels in chicks are not associated with disease susceptibility,  
177 although there may be a correlation with viral spread.



178           A challenge model was established for CAV disease, based on the overdosage of a live  
179 vaccine. The use of experimental challenge models is relevant since it allows the replication of  
180 trials with reproducibility. We also propose the use of a live vaccine overdosage as a CAV  
181 challenge model due to the added advantage of enabling laboratories that do not have the  
182 expensive virology infrastructure to study the disease. The model was able to replicate the  
183 effects of virulent CAV infections in unprotected chicks. During infection, the virus is intensely  
184 located in the cortex and corticomedullary junction of the thymus, inducing CD4<sup>+</sup> and CD8<sup>+</sup> cell  
185 loss and T cell-dependent immune suppression [11,12]. Leukopenia (with loss of CD4<sup>+</sup> and  
186 CD8<sup>+</sup> cells), anaemia, thymic lesions, and reduced weight gain were induced in challenged, non-  
187 immune chicks. Virus could be detected by qPCR in thymus. Passively immunized animals had  
188 reduced effects of the challenge, whereas the negative control remained free from alterations.  
189 Therefore, the live vaccine experimental model could replicate the effects of wild-type CAV  
190 infection and is amenable to replication by laboratories that do not possess virology  
191 infrastructure.

192           The vaccine-induced challenge model was used to determine the effect of maternally  
193 derived antibodies in the protection of the progeny. Day-old chicks were grouped based on their  
194 anti-CAV levels. As it was expected, SPF birds, that do not carry maternal immunity to CAV,  
195 were very susceptible to the challenge, being rapidly infected by the virus and demonstrating  
196 anaemia and impairment of immunity. Interestingly, all the chicks derived from vaccinated  
197 breeders were consistently protected from the challenge, regardless of the levels of maternal  
198 antibodies. Lower levels of MDA increased the early (D4 and D14 post-hatch and challenge)  
199 prevalence of CAV, but this did not result in higher average virus levels or in loss of immune  
200 cells and erythrocytes. Virus loads in immune organs are correlated to the reduction of tissue  
201 lymphocyte counts [6], as observed here with virus quantification in thymus by qPCR, thymic  
202 lesions, and numbers of CD4<sup>+</sup> and CD8<sup>+</sup> cells.

203           In conclusion, these findings confirm that maternal immunity is critical in the protection  
204 of chicks against CAV disease, but that it is not necessarily mediated by CAV-specific

205 antibodies [6]. Other mechanisms can be involved in the protection of the offspring by maternal  
206 immunity: 1) Breeders also transfer high levels of natural antibodies (NAb) to their progeny.  
207 These are important components of innate recognition of pathogens in the absence of previous  
208 stimulation by an antigen [13]. Immunization alters the NAb repertoire, albeit not specifically  
209 against an antigen, as is normally intended by vaccination, due to the unspecific nature of NAb  
210 [14]. In this way, NAb may partly respond for the improved CAV resistance of chicks with  
211 maternally derived immunity; 2) CAV infection induces immune suppression by TCR  
212 dysregulation, and maternally derived immune cell effectors may be part of the protection  
213 provided by the breeders to their offspring [15]; 3) Maternal influence on the immunity of  
214 chicks can also be mediated by hormones passed through the egg [16]. This, and the obvious  
215 difference in the genetic background, may have accounted for some of the differences between  
216 SPF and commercial birds [17].

#### 217 **Authors' contributions**

218 M.I., B.C.B.B., F.R., and L.F.C. were responsible for the trials. M.I., B.C.B.B., L.F.C., L.D.B.,  
219 and L.C.A. designed the experiment. B.C.B.B. drafted the manuscript and all authors were  
220 responsible for its correction and approval.

#### 221 **Declaration of competing interest**

222 L.D.B. is affiliated to Elanco, L.C.A., and M.A.P.A are affiliated to Hendrix, which sponsored  
223 this study. M.I., F.R., B.C.B.B., and L.F.C. are affiliated to Imunova Análises Biológicas, which  
224 provides services to Elanco and Hendrix.

#### 225 **Funding**

226 This work was funded by Hendrix Genetics and by Elanco.

#### 227 **References**

228 [1] Canal CW, Ferreira DJ, Macagnan M, Fallavena LCB, Moraes HLS, Wald VB.  
229 Prevalence of antibodies against chicken anaemia virus (CAV) in broiler breeders in

- 230 Southern Brazil. *Pesqui Veterinária Bras* 2004;24:89–92.
- 231 [2] Schat KA. Chicken anemia virus. *TT Viruses*, Springer; 2009, p. 151–83.
- 232 [3] Adair BM. Immunopathogenesis of chicken anemia virus infection. *Dev & Comp*  
233 *Immunol* 2000;24:247–55.
- 234 [4] Khoshkhoo PH, Akbariazad G, Tashakori M. Comparison of CAV antibody titers in a  
235 vaccinated and naturally infected broiler breeder flocks. *African J Microbiol Res*  
236 2011;5:3162–5.
- 237 [5] Vaziry A. Chicken infectious anemia virus vaccination induces immune disorders and  
238 viral persistency in infectious bursal disease virus-infected young chicks. Université de  
239 Montréal, 2011.
- 240 [6] Santen VL van, Joiner KS, Murray C, Petrenko N, Hoerr FJ, Toro H. Pathogenesis of  
241 chicken anemia virus: comparison of the oral and the intramuscular routes of infection.  
242 *Avian Dis* 2004;48:494–504.
- 243 [7] Rostagno HS, Albino LFT, Donzele JL, Gomes PC, Oliveira RF de, Lopes DC, et al.  
244 Tabelas brasileiras para aves e suínos: composição de alimentos e exigências  
245 nutricionais. 2nd ed. Viçosa: UFV; 2005.
- 246 [8] Beirão BCB, Ingberman M, Fávoro Jr. C, Caron LF. Reference parameters of peripheral  
247 immune cell populations in broiler chickens using a large database. *Br Poult Sci*  
248 2019;212:00071668.2019.1697428. <https://doi.org/10.1080/00071668.2019.1697428>.
- 249 [9] Sommer F, Cardona C. Chicken anemia virus in broilers: dynamics of the infection in  
250 two commercial broiler flocks. *Avian Dis* 2003;47:1466–73.
- 251 [10] Eltahir YM, Qian K, Jin W, Wang P, Qin A. Molecular epidemiology of chicken anemia  
252 virus in commercial farms in China. *Virology* 2011;8:145. [https://doi.org/10.1186/1743-](https://doi.org/10.1186/1743-422X-8-145)  
253 [422X-8-145](https://doi.org/10.1186/1743-422X-8-145).
- 254 [11] Kuscu B, Gürel A. Lesions in the thymus and bone marrow in chicks with

- 255 experimentally induced chicken infectious anemia disease. *J Vet Sci* 2008;9:15–23.
- 256 [12] Hu L, Lucio B, Schat KA. Depletion of CD4<sup>+</sup> and CD8<sup>+</sup> T lymphocyte subpopulations  
257 by CIA-1, a chicken infectious anemia virus. *Avian Dis* 1993:492–500.
- 258 [13] Ismiraj MR, Arts JAJ, Parmentier HK. Maternal transfer of natural (auto-) antibodies in  
259 chickens. *Poult Sci* 2019;98:2380–91.
- 260 [14] Beinart D, Ren D, Pi C, Poulton S, Holzknacht ZE, Swanson C, et al. Immunization  
261 enhances the natural antibody repertoire. *EXCLI J* 2017;16:1018.
- 262 [15] Giotis ES, Rothwell L, Scott A, Hu T, Talbot R, Todd D, et al. Transcriptomic profiling  
263 of virus-host cell interactions following chicken anaemia virus (CAV) infection in an in  
264 vivo model. *PLoS One* 2015;10:e0134866.
- 265 [16] Müller W, Groothuis TGG, Kasprzik A, Dijkstra C, Alatalo R V, Siitari H. Prenatal  
266 androgen exposure modulates cellular and humoral immune function of black-headed  
267 gull chicks. *Proc R Soc B Biol Sci* 2005;272:1971–7.
- 268 [17] Aricibasi M, Jung A, Heller ED, Rautenschlein S. Differences in genetic background  
269 influence the induction of innate and acquired immune responses in chickens depending  
270 on the virulence of the infecting infectious bursal disease virus (IBDV) strain. *Vet*  
271 *Immunol Immunopathol* 2010;135:79–92.

272 **Figure legends**

273 **Fig. 1.** The Chicken Anaemia challenge model was consistent with wild-type infections. Chicks  
274 derived from immunized breeders were serologically positive at the start of the trial, whereas  
275 SPF birds were induced to produce antibodies by the challenge. Serologic positivity was studied  
276 at sample dilutions of 1:10 and 1:100. SPF antibody was not measured in D1 (A). Lack of  
277 maternally derived antibodies (MDA) leads to rapid and intense thymus infection following  
278 challenge, as measured by qPCR for CAV. MDA partially prevented this (B). Thymic lesions  
279 were in accordance with virus levels [n = 4 pools of 2 birds/group] (C). The typical capacity of  
280 CAV in affecting progenitor cells seemed to occur, as seen by the reduction in total leukocyte  
281 counts and the subsets of CD45<sup>+</sup>CD4<sup>+</sup>CD8<sup>-</sup> and CD45<sup>+</sup>CD4<sup>-</sup>CD8<sup>+</sup>, but not in CD45<sup>+</sup>CD4<sup>+</sup>CD8<sup>+</sup>  
282 (D). Similarly, the blood packed cell volume (PCV) was reduced following the challenge (E).  
283 Finally, bird body weight was negatively affected by the challenge in the absence of MDA, but  
284 not in its presence (F). Statistical analysis by two-way ANOVA with Tukey's posthoc test ( $P <$   
285 0.05 unless stated otherwise), except for histology scores (Kruskal-Wallis test). Significant  
286 differences on a given date are indicated by different letters in the colours of the corresponding  
287 group. Significant differences throughout the experiment (main treatment effect) are indicated  
288 by different letters next to the legend of each graph. The qPCR graph shows the median  $\pm$   
289 ranges. The histology graph indicates the median, and each dot represents an animal. Other  
290 graphs show average  $\pm$  SD.

291

292 **Fig. 2.** Protection from Chicken Anaemia disease is not dependent on maternally derived  
293 antibodies (MDA). Day-old chicks were segregated in isolators based on their antibody  
294 positivity and levels for CAV (A). SPF birds were used as MDA-free controls. All animals were  
295 challenged with CAV. Higher maternal antibody levels withheld the incidence of CAV in  
296 thymuses, but overall viral loads were similar in chicks from vaccinated breeders, regardless of  
297 MDA (B). In accordance, thymic lesions (C) and erythrocyte packed cell volume (D) were  
298 preserved in the presence of maternal immunity, regardless of the levels of anti-CAV

299 antibodies. Statistical analysis by two-way ANOVA with Tukey's posthoc test ( $P < 0.05$  unless  
300 stated otherwise), except for histology scores (Kruskal-Wallis test). Significant differences on a  
301 given date are indicated by different letters in the colours of the corresponding group.  
302 Significant differences throughout the experiment (main treatment effect) are indicated by  
303 different letters next to the legend of each graph. The qPCR graph shows the median  $\pm$  ranges.  
304 The histology graph indicates the median, and each dot represents an animal. Other graphs show  
305 average  $\pm$  SD.  
306

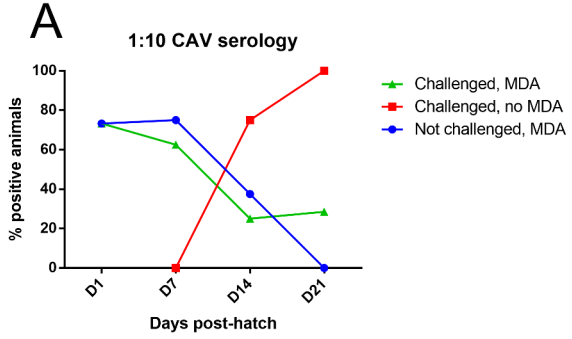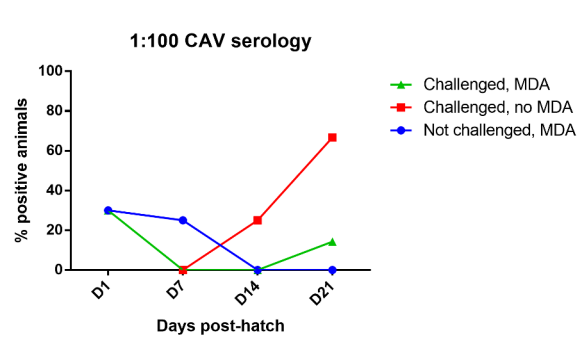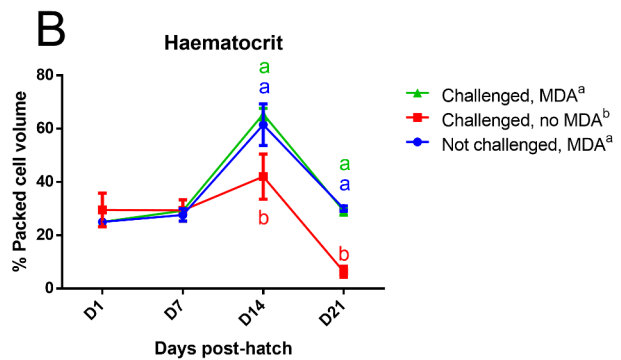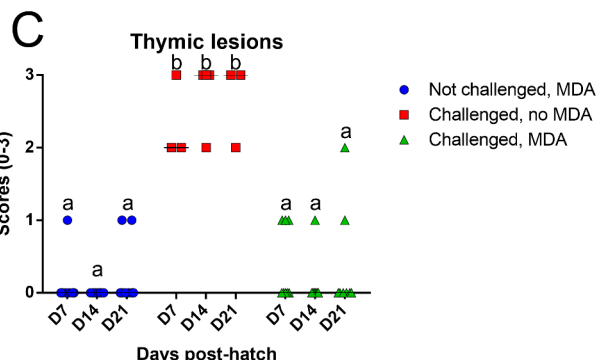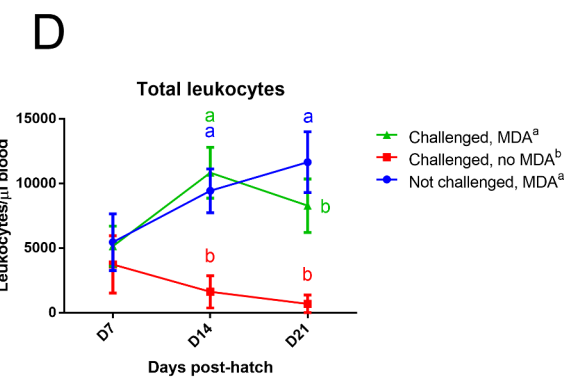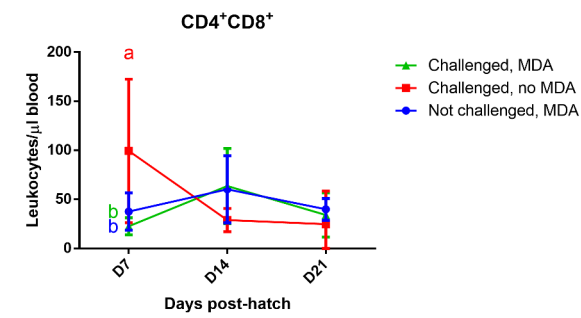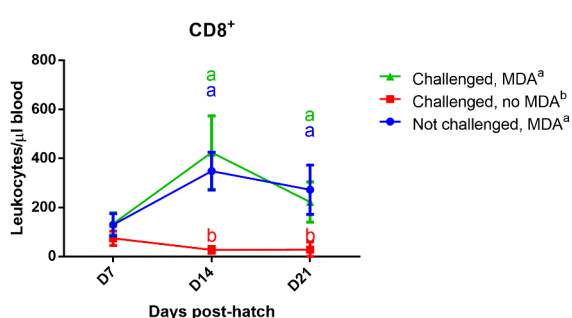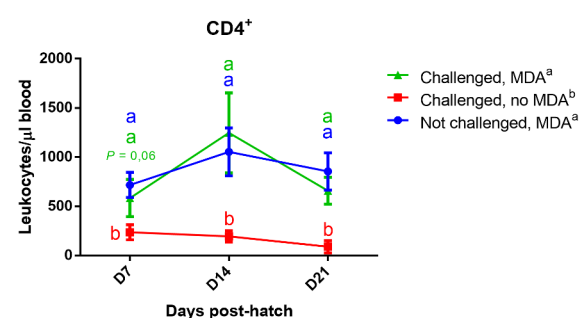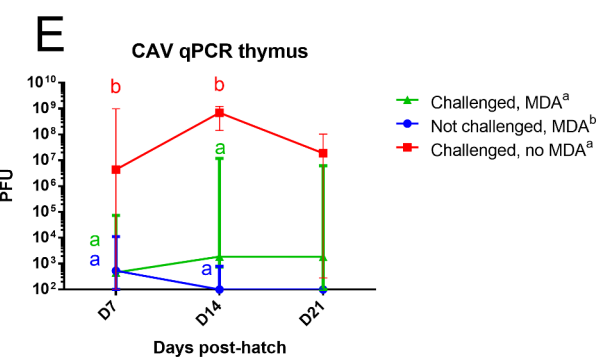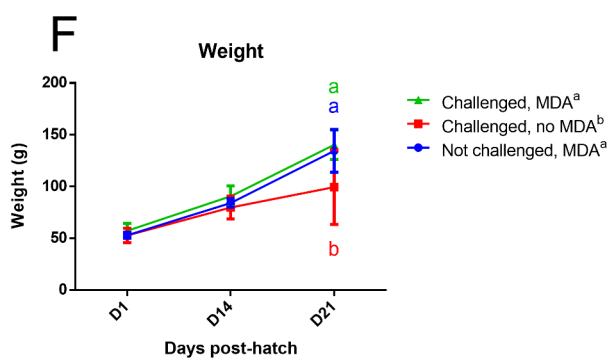

**A**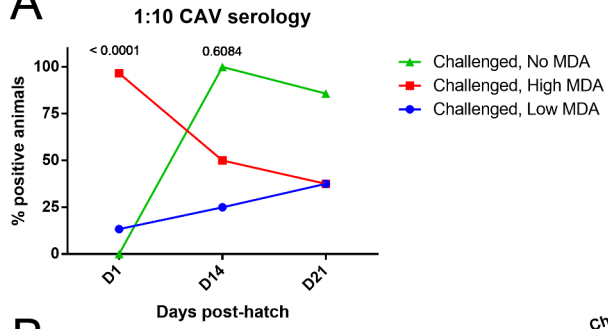**Competitive ELISA S/N ratios**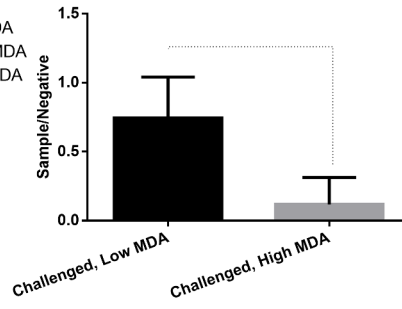**B**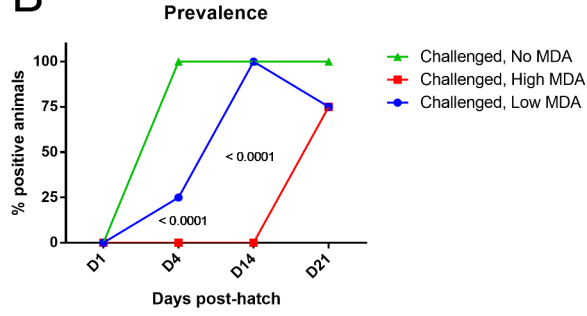**CAV qPCR thymus**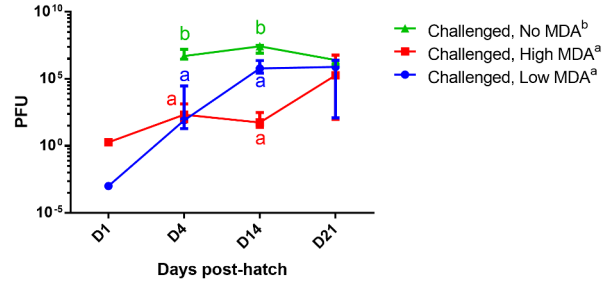**C**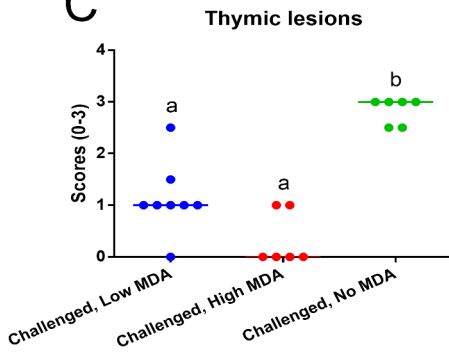**D**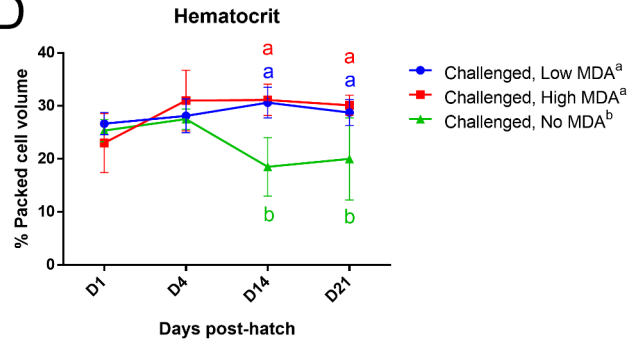

Source: https://biorxiv.org/content/10.1101/2020.12.15.422992v1.full.pdf
